# Supplementary material
Source: PubMed Central journal article supplement (PMC6016799)
Supplement: pnas.1802179115.sapp.pdf [file pnas.1802179115.sapp.pdf]

## SI information

### SI Materials and Methods

**Animals and animal care.** Male adult C57BL/6 mice, aged 12 weeks (body weight 25–30g, Japan SLC, Inc., Hamamatsu, Japan) were used. sEH KO mice (body weight 26–32g) with targeted deletion of sEH gene (*Ephx2*) which is backcrossed to C57BL/6 background were used (61). Animals were housed under controlled temperatures and 12 hour light/dark cycles (lights on between 07:00–19:00 h), with ad libitum food (CE-2; CLEA Japan, Inc., Tokyo, Japan) and water. This study was carried out in strict accordance with the recommendations in the Guide for the Care and Use of Laboratory Animals of the National Institutes of Health, USA.

**Materials.** 1-Methyl-4-phenyl-1,2,3,6-tetrahydropyridine (MPTP; Tokyo Chemical Industry CO., LTD., Tokyo, Japan) was dissolved in saline. The sEH inhibitor TPPU, 1-trifluoromethoxyphenyl-3-(1-propionyl)piperidin-4-yl)urea, was synthesized as previously described (32). TPPU (0.3–3.0 mg/kg) was dissolved in 10% polyethylene glycol 400 (PEG400; Wako Pure Chemical Co., Tokyo, Japan). Detailed information of antibodies used in this study was included in the Table S3. Other reagents were purchased commercially.

**MPTP-induced mouse model of PD.** First, mice were divided into four groups: (1): control group, (2–4): MPTP (10, 15, or 20 mg/kg x 3, 2-hr interval. 9:00, 11:00 and 13:00). Seven days after administration of MPTP, mice were deeply anesthetized with isoflurane and perfused transcardially with 10 ml of isotonic saline, followed by 40 ml of ice-cold 4% paraformaldehyde in 0.1 M phosphate buffer (pH 7.4). Brains were removed from the skulls and postfixed overnight at 4°C, and brain was used for immunohistochemistry of dopamine transporter (DAT) and tyrosine hydrogenase (TH).

Second, mice were randomly divided into six groups: (1): control group, (2): MPTP groups, (3) TPPU group. MPTP (10 mg/kg x 3, 2-hr interval. 9:00, 11:00 and 13:00) or saline (10 ml/kg x 3, 2-hr interval) was injected into mice. Vehicle (10 ml/kg) or TPPU (0.3, 1.0, or 3 mg/kg. 19:00) was administered orally 6 hours after the final administration of saline or MPTP. Subsequently, vehicle or TPPU (3.0 mg/kg) were injected orally twice daily (9:00 and 19:00) for additional 6 days (days 2–7). Mice were sacrificed on day 8, and striatum from mouse brain was collected. Brain samples

were stored at -80°C before the use of high performance liquid chromatography (HPLC).

Third, mice were divided into four groups: (1): control group, (2-4): MPTP (10 mg/kg x 3, 2-hr interval). MPTP (10 mg/kg x 3, 2-hr interval. 9:00, 11:00 and 13:00) or saline (10 ml/kg x 3, 2-hr interval) was injected i.p. into mice. Vehicle (10 ml/kg) or TPPU (3 mg/kg) were administered orally 6 hours after the final administration of saline or MPTP. Subsequently, vehicle or TPPU (3.0 mg/kg) were injected orally twice day (9:00 and 19:00) for additional 6 days (days 2 ó 7). On day 8, mice were deeply anesthetized with isoflurane and perfused transcardially with 10 ml of isotonic saline, followed by 40 ml of ice-cold 4% paraformaldehyde in 0.1 M phosphate buffer (pH 7.4). Brains were removed from the skulls and postfixed overnight at 4°C, and brain was used for immunohistochemistry.

Fourth, wild mice and sEH KO mice were divided into two groups, respectively. Subsequently, these two groups were divided into control group and MPTP (10 mg/kg x 3, 2-hr interval. 9:00, 11:00 and 13:00). On day 8, mice were deeply anesthetized with isoflurane and perfused transcardially with 10 ml of isotonic saline, followed by 40 ml of ice-cold 4% paraformaldehyde in 0.1 M phosphate buffer (pH 7.4). Brains were removed from the skulls and postfixed overnight at 4°C, and brain was used for immunohistochemistry.

**Measurement of DA, DOPAC, and HVA in mouse striatum by HPLC.** Tissue levels of DA and its metabolites (DOPAC, HVA) were measured as previously reported (62,63). Tissue samples (striatum) were homogenized in 0.2 M perchloric acid (HClO<sub>4</sub>) containing 100 µM disodium EDTA and 100 ng/ml isoproterenol (internal standard), and were then centrifuged at 20,000×g for 15 min at 4°C. The supernatants were filtered through a 0.45-µm pore membrane (Millex-LH, 4 mm; Millipore, Tokyo, Japan) and were analyzed for 5-HT, 5-HIAA, DA, and DOPAC by HPLC coupled with electrochemical detection. The HPLC system consisted of a liquid chromatograph pump (EP-300, Eicom, Kyoto, Japan), a degasser (DG-300, Eicom, Kyoto, Japan), a reversed phase column (Eicompak SC-5ODS 150×3.0 mm; Eicom, Kyoto, Japan), an ECD-300 electrochemical detector (Eicom, Kyoto, Japan), and a data processor (EPC-300, Eicom, Kyoto, Japan). The mobile phase was 0.1 M acetate-citric acid buffer (pH 3.5)

containing 16% methanol, 5 mg/l disodium EDTA and 190 mg/l sodium octyl sulfate.

### **Immunohistochemistry of DAT, TH and OX42 in mouse brains.**

Immunohistochemistry of DAT and TH was performed as reported previously (62-64). The mouse brain sections (Bregma 0.86–1.54mm) were identified according to stereotaxic coordinates in Franklin and Paxinos' Mouse Brain (65). Free-floating sections were treated with 0.3% H<sub>2</sub>O<sub>2</sub> in 0.05M Tris-HCl saline (TBS) for 30 min and blocked in TBS containing 0.2% Triton X-100 (TBST) and 1.5% normal serum for 1 hour, at room temperature. Samples were then incubated for 36 hours at 4°C, with rat anti-DAT antibody or with rabbit TH antibody. The sections were washed three in TBST, and processed according to the avidin-biotin-peroxidase method (Vectastain Elite ABC, Vector Laboratories, Inc., Burlingame, CA, USA). Sections were then incubated for 5 minutes in a solution of 0.15 mg/ml diaminobenzidine, containing 0.01% H<sub>2</sub>O<sub>2</sub>. The sections were mounted on gelatinized slides, dehydrated, cleared, and coverslipped under Permount<sup>®</sup> (Fisher Scientific, Fair Lawn, NJ, USA).

For immunofluorescence detection of TH and OX42, the mouse brain section (Bregma 0.86–1.54mm and -2.92–-3.88 mm) were identified according to stereotaxic coordinates in Franklin and Paxinos' Mouse Brain (65). The brain sections were blocked in TBS containing 0.2% Triton X (TBST) and 1.5% normal serum for 1 hour at room temperature. Then, sections were incubated overnight at 4°C, with rabbit TH antibody or rat OX42 antibody. Next day, sections were washed three times in TBST, and incubated in fluorochrome-conjugated secondary antibody diluted in antibody dilution for 2 hours at room temperature in the dark. After wash three times with TBST, the sections were coverslipped under Prolong<sup>®</sup> Gold Antifade Reagent (Cell Signaling Technology, USA).

The staining intensity of DAT or TH immunoreactivity in the anterior regions (0.25 mm<sup>2</sup>) of the striatum, and the number of TH-positive cells in SNc and OX42-positive cells in striatum (0.06mm<sup>2</sup>) were imaged and analyzed using Keyence BZ-9000 Generation microscope (Keyence Co., Ltd, Osaka, Japan) and ImageJ software package.

**Viral vector preparation and injection.** The transfer plasmid (pAAV-CAGGS-Ephx2-P2A-EmGFP) was constructed by Invitrogen. The viral vectors

were prepared as described previously (66). Briefly, the AAV vectors were packaged using the AAV Helper Free Expression System (Cell Biolabs, Inc., San Diego, CA). The packaging plasmids (pAAV-DJ and pHelper) and transfer plasmid (pAAV-CAGGS-Ephx2-P2A-EmGFP or pAAV-CAGGS-EGFP) were transfected into HEK293T cells using the calcium phosphate method. After 48h incubation, AAV vector particles were obtained and purified by serial ultracentrifugation with cesium chloride. The purified particles were dialyzed with PBS, and then concentrated by ultrafiltration using an Amicon 10k MWCO filter (Merck Millipore, Darmstadt, Germany). The copy number of the viral genome (vg) was determined by the TaqMan Universal Master Mix II (Applied Biosystems, Foster City, CA). Real-time quantitative PCR was performed in duplicate samples using the StepOne real-time PCR system as follows: 95°C for 10min; 40 cycles of (95°C, 15s and 60°C, 1min).

To induce gene expression in the striatum, AAV DJ-CAGGS-Ephx2-P2A-EmGFP or AAV DJ-CAGGS-EGFP vectors ( $1.0 \times 10^{12}$  vg/ml) were stereotaxically injected into the striatum of C57BL/6 male mice at 9 weeks old by microinjection tube connected to a microinfusion pump (0.5  $\mu$ l/site, 0.1  $\mu$ l/min). The anteroposterior, mediolateral, and dorsoventral coordinates relative to Bregma were as follows: +1.1 mm,  $\pm$ 1.0 mm and 3.0 mm (65).

**Western blot analysis of mouse brain samples.** Western blot analysis was performed as reported previously (25,67). Mice were killed by cervical dislocation and brains were rapidly removed from the skull, and the striatum of mice were dissected on ice. The tissue samples were homogenized in Leammli lysis buffer. 50  $\mu$ g of protein were measured using the DC protein assay kit (Bio-Rad), and incubated for 5 min at 95 °C, with an equal volume of 125 mM Tris-HCl, pH6.8, 20% glycerol, 0.1% bromophenol blue, 10%  $\beta$ -mercaptoethanol, 4% sodium dodecyl sulfate, and subjected to sodium dodecyl sulfate polyacrylamide gel electrophoresis, using 7.5% or AnyKD mini-gels (Mini-PROTEAN<sup>®</sup> TGX<sup>®</sup> Precast Gel; Bio-Rad, CA, USA). Proteins were transferred onto polyvinylidenedifluoride (PVDF) membranes using a Trans Blot Mini Cell (Bio-Rad). For immunodetection, the blots were blocked with 2% BSA in TBST (TBS + 0.1% Tween-20) for 1 h at room temperature (RT), and kept with primary antibodies overnight at 4°C. The primary antibodies were used (Table S3). The next day, blots were washed three times in TBST and incubated with horseradish peroxidase conjugated

anti-rabbit or anti-mouse antibody 1 hour, at RT. After final three washes with TBST, bands were detected using enhanced chemiluminescence (ECL) plus the Western Blotting Detection system (GE Healthcare Bioscience). Images were captured with a ChemDoc imaging system (Bio-Rad), and the immunoreactive bands were analysis by Image Lab software.

**Western blot analysis of postmortem brain samples.** The postmortem brain samples from DLB patients (n = 10, age:  $86.7 \pm 2.28$  years old (range: 72 ó 93), 9 male and 1 female) and age-matched controls (n = 10, age  $79.1 \pm 3.19$  years old (range: 62 ó 94), 8 male and 2 female)) were collected at Tokyo Metropolitan Geriatric Hospital and Institute of Gerontology (Tokyo, Japan). Brain samples were selected using the Brain Bank for Aging Research (BBAR) Lewy bodies rating system (68). Stages III to V correspond to the Lewy body diseases cases of PD, PD with dementia, and DLB (including DLB with Alzheimer's disease)(69,70). Western blot analysis of DAT, TH,  $\alpha$ -synuclein and phosphorylated  $\alpha$ -synuclein in the striatum was performed as described above.

**Oxylipin profiling.** Mice were divided into control group and MPTP (10 mg/kg x 3, 2-hr interval. 9:00, 11:00 and 13:00). On day 8, mice were deeply anesthetized with isoflurane and brains were removed from the skulls. Striatum was dissected from brain, and the samples were stored at -80 °C before assay. Measurement of eicosanoids was performed using the previous method (71).

**Human iPSC cells.** The control human iPSC lines 201B7 (72) and familial PD (PARK2) lines PB20 (34) were cultured on mitomycin C-treated SNL murine fibroblast feeder cells in iPSC medium, according to the previous report (72).

Total RNA isolated from induced Neuron from iPSC using RNeasy mini Kit (QIAGEN), according to the manufacturer's instructions. cDNA was generated from 0.5  $\mu$ g of total RNA with SuperScript<sup>®</sup> reverse transcriptase (Invitrogen) and random Hexamers (Invitrogen). qPCR analysis was performed with SYBR premix Ex Taq (TaKaRa) on QuantStudio 7 Flex (Applied Biosystems). Values were normalized to  $\beta$ -actin and were analyzed by comparative (Ct) methods. The primer sequences were as follows: human sEH forward 5'-ACTTCGTGCTCGTTCCTCAG-3' Human sEH reverse 5'-AGTGCCACAGTCCTCAATG-3' Human  $\beta$ -actin forward

5'-TGAAGTGTGACGTGGACATC-3' Human  $\beta$ -actin reverse  
5'-GGAGGAGCAATGATCTTGAT-3'

For the differentiation of midbrain dopaminergic (mDA) neurons, we used a previously reported method (73-75), with slight modifications. Briefly, the iPSCs were cultured in iPSC medium supplemented with 3  $\mu$ M SB431542 (Tocris), 3  $\mu$ M Dorsomorphin (Sigma), and 3  $\mu$ M CHIR99021 (Stemgent) for 5 days. For neurosphere formation, iPSC colonies were dissociated into single cells by TrypLE Select (Life technologies) and cultured in medium hormone mix (MHM) medium (KOHJIN BIO) supplemented with B27 (Life technologies), 20 ng/ml basic fibroblast growth factor (bFGF; Pepro Tech), 2  $\mu$ M SB431542 (Tocris), 5  $\mu$ M Y27632 (Wako) in 4% O<sub>2</sub>. Defining the day on which neurosphere culture was started as day 0, on day 3, 3  $\mu$ M CHIR99021, and 2  $\mu$ M Purmorphamine (Millipore) were added to culture medium. For terminal differentiation, on day 14, neurospheres were dissociated and seeded on poly-L-ornithine (Sigma) and Fibronectin (Corning)-coated 96 well culture plates in MHM supplemented with B27, 20 ng/ml brain-derived neurotrophic factor (BDNF; Biologend), glial cell-derived neurotrophic factor (GDNF; Pepro Tech), 200  $\mu$ M ascorbic acid (Sigma), 0.5 mM dibutyryl-cAMP (Nakalai Tesque), 1 ng/ml transforming growth factor  $\beta$  (TGF- $\beta$ ; Biologend) and 10  $\mu$ M DAPT (Sigma), and cultured for 17 days before analysis. Apoptosis was quantified and evaluated by the intensity of Cleaved Caspase-3 staining using IN Cell Analyzer 2200 (GE Healthcare). The mDA neurons were incubated with 10  $\mu$ M TPPU or 0.1% DMSO as controls, for 10 days. After 10 days, mDA neuron were fixed with 4% paraformaldehyde (PFA) in PBS for 30 min at room temperature. Nonspecific proteins were blocked with 5% FBS and 0.3% Triton X-100 in PBS, and stained with the following primary antibodies;  $\beta$ -tubulin, TH, cleaved Caspase-3. The cells were then rinsed with incubated with species specific Alexa Fluor 488-, Alexa Fluor 555-, or Alexa Fluor 647-conjugated secondary antibodies, and Hoechst 33258 (1:5000; Sigma) for 1h at room temperature. The well for each experimental condition was duplicated. Fixed and Stained plates mDA neuron were imaged by IN Cell Analyzer 2200 (GE Healthcare), and 25 fields were collected from each well using 20x objective. The images were analyzed by IN Cell Developer Toolbox v1.9 (GE Healthcare), and identified nuclei with Hoechst, neuronal cell body

with  $\beta$ -tubulin, dopaminergic neuron with TH, and apoptosis with Cleaved Caspase-3. By setting the areas of  $\beta$ -tubulin and TH-positive cells, the intensity of Cleaved Caspase-3 in dopaminergic neurons was analyzed.

**Statistical analysis.** The data show as the mean  $\pm$  standard error of the mean (S.E.M.). Analysis was performed using GraphPad Prism (La Jolla, CA). Comparisons between groups were performed using the one-way analysis of variance (ANOVA) or two-way ANOVA, followed by Fisher's LSD test. Comparisons between two groups were performed using Student t-test. The P-values of less than 0.05 were considered statistically significant.

## References

61. Sinai CJ, et al (2000) Targeted disruption of soluble epoxide hydrolase reveals a role in blood pressure regulation. *J Biol Chem* 275:40504-40510.
62. Koike K, et al (2005) The immunophilin ligand FK506 protects against methamphetamine-induced dopaminergic neurotoxicity in mouse striatum. *Neuropharmacology* 48:391-397.
63. Zhang L, et al (2006) Protective effects of minocycline on behavioral changes and neurotoxicity in mice after administration of methamphetamine. *Prog Neuropsychopharmacol Biol Psychiatry* 30:1381-1393.
64. Ren Q, Zhang JC, Ma M, Fujita Y, Wu J, Hashimoto K (2014) 7,8-Dihydroxyflavone, a TrkB agonist, attenuates behavioral abnormalities and neurotoxicity in mice after administration of methamphetamine. *Psychopharmacology (Berl)* 231:159-166.
65. Paxinos G, Franklin K (2002) Paxinos and Franklin's the Mouse Brain in Stereotaxic Coordinates, 4<sup>th</sup> Edition. Academic Press.
66. Kobayashi K, et al (2016) Survival of corticostriatal neurons by Rho/Rho-kinase signaling pathway. *Neurosci Lett* 630:45-52.
67. Ren Q, et al (2015) BDNF-TrkB signaling in the nucleus accumbens shell of mice has key role in methamphetamine withdrawal symptoms. *Transl Psychiatry* 5:e666.
68. Saito Y, et al (2003) Accumulation of phosphorylated alpha-synuclein in aging human brain. *J Neuropathol Exp Neurol* 62:644-654.
69. Morimoto S, et al (2017) Homovanillic acid and 5-hydroxyindole acetic acid as biomarkers for dementia with Lewy bodies and coincident Alzheimer's disease: An autopsy-confirmed study. *PLOS One* 12:e0171524.

70. Saito Y, et al (2004) Lewy body-related  $\alpha$ -synucleinopathy in aging. *J Neuropathol Exp Neurol* 63:7426749.
71. Yang J, Schmelzer K, Georgi K, Hammock BD (2009) Quantitative profiling method for oxylipin metabolome by liquid chromatography electrospray ionization tandem mass spectrometry. *Anal Chem* 81:808568093.
72. Takahashi K, et al (2007) Induction of pluripotent stem cells from adult human fibroblasts by defined factors. *Cell* 131:8616872.
73. Imaizumi K, et al (2015) Controlling the regional identity of hPSC-derived neurons to uncover neuronal subtype specificity of neurological disease phenotypes. *Stem Cell Reports* 5:101061022
74. Matsumoto T, (2016) Functional neurons generated from T cell-derived induced pluripotent stem cells for neurological disease modeling. *Stem Cell Reports* 6:4226435.
75. Fujimori K, Matsumoto T, Kisa F, Hattori N, Okano H, and Akamatsu W (2017) Escape from pluripotency via inhibition of TGF- $\beta$ /BMP and activation of Wnt signaling accelerates differentiation and aging in hPSC progeny cells. *Stem Cell Reports* 9:167561691.



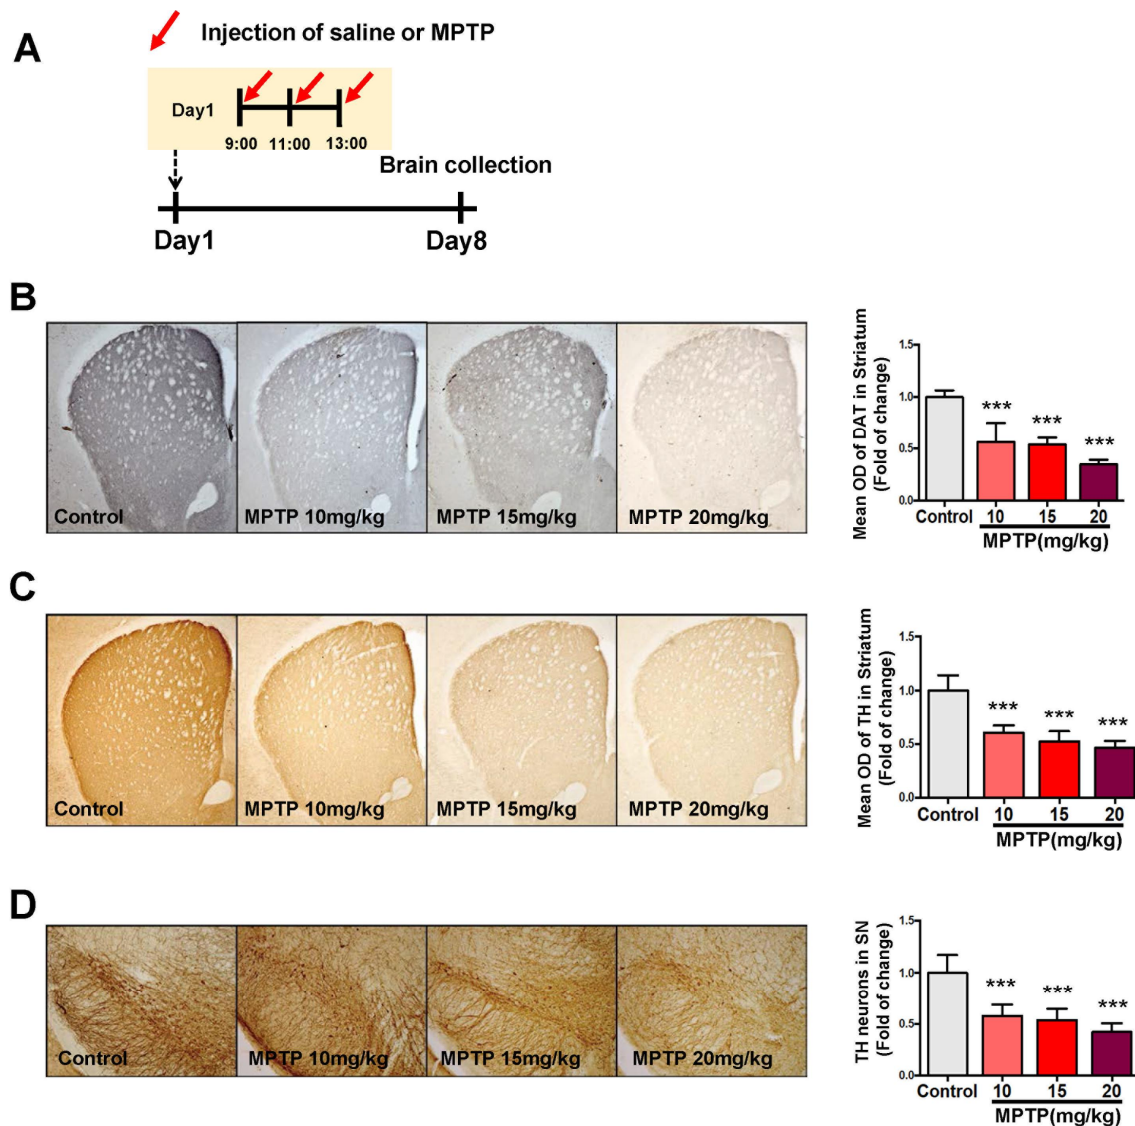

**Figure S1. Effects of MPTP-induced neurotoxicity in the mouse brain.** (A): Schedule of treatment and brain collection. (B-D): MPTP (10, 15, or 20 mg/kg x 3, 2-hr interval, IP, 9:00, 11:00, and 13:00) or saline was administered into mice. On day 8, mice were perfused for immunohistochemistry of DAT and TH. (B): Typical immunohistochemistry of DAT in the striatum. One-way ANOVA revealed the results ( $F_{3,17} = 30.29$ ,  $P < 0.001$ ). (C): Typical immunohistochemistry of TH in the striatum. One-way ANOVA revealed the results ( $F_{3,17} = 31.63$ ,  $P < 0.001$ ). (D): Typical immunohistochemistry of TH in the SN. One-way ANOVA revealed the results ( $F_{3,17} = 21.07$ ,  $P < 0.001$ ). Data are shown as mean  $\pm$  S.E.M. (n = 5 or 6). \*\*\* $P < 0.001$  compared to control group.

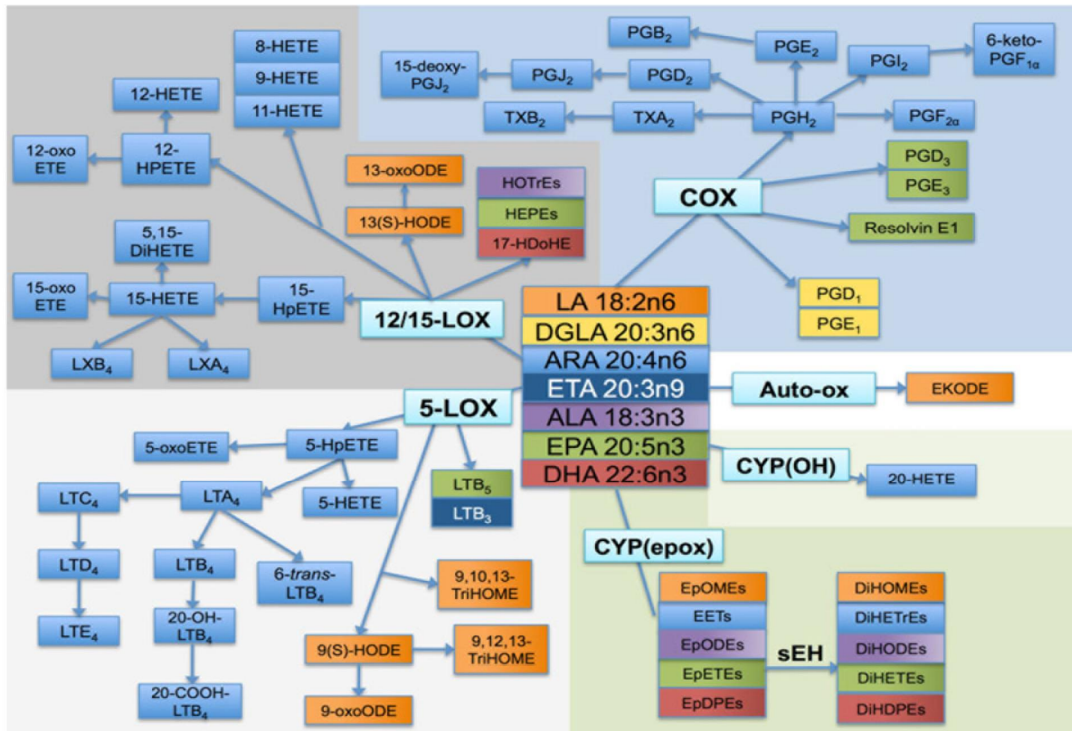

Figure S2. Eicosanoids measured in the striatum from control and MPTP-treated mice

**Table S1. Detailed data of statistical analyses.**

|         | Graph                          | Statistical test | Power | Factor effect                          |                                       | Interaction effect              |
|---------|--------------------------------|------------------|-------|----------------------------------------|---------------------------------------|---------------------------------|
| Fig.1 B | DA                             | One-way ANOVA    | n=7-8 | $F_{5,41} = 19.01, P < 0.001$          |                                       |                                 |
| Fig.1 C | DOPAC                          | One-way ANOVA    | n=7-8 | $F_{5,41} = 13.94, P < 0.001$          |                                       |                                 |
| Fig.1 D | HVA                            | One-way ANOVA    | n=7-8 | $F_{5,41} = 18.74, P < 0.001$          |                                       |                                 |
| Fig.1 G | DAT                            | Two-way ANOVA    | n=6   | MPTP: $F_{1,20} = 12.65, P = 0.002$    | TPPU: $F_{1,20} = 2.846, P = 0.107$   | $F_{1,20} = 11.18, P = 0.003$   |
| Fig.1 H | TH                             | Two-way ANOVA    | n=6   | MPTP: $F_{1,20} = 26.57, P < 0.001$    | TPPU: $F_{1,20} = 29.76, P < 0.001$   | $F_{1,20} = 13.12, P = 0.0017$  |
| Fig.1 J | TH                             | Two-way ANOVA    | n=6   | MPTP: $F_{1,20} = 17.46, P = 0.0005$   | TPPU: $F_{1,20} = 4.274, P = 0.052$   | $F_{1,20} = 14.92, P = 0.001$   |
| Fig.2 B | DA                             | Two-way ANOVA    | n=8   | MPTP: $F_{1,28} = 14.52, P = 0.0007$   | KO: $F_{1,28} = 6.096, P = 0.0199$    | $F_{1,28} = 4.837, P = 0.0363$  |
| Fig.2 C | DOPAC                          | Two-way ANOVA    | n=8   | MPTP: $F_{1,28} = 7.822, P = 0.0092$   | KO: $F_{1,28} = 4.189, P = 0.0502$    | $F_{1,28} = 4.980, P = 0.0338$  |
| Fig.2 D | HVA                            | Two-way ANOVA    | n=8   | MPTP: $F_{1,28} = 3.753, P = 0.0637$   | KO: $F_{1,28} = 7.985, P = 0.0089$    | $F_{1,28} = 5.174, P = 0.0314$  |
| Fig.2 G | DAT                            | Two-way ANOVA    | n=8   | MPTP: $F_{1,28} = 6.692, P = 0.0154$   | KO: $F_{1,28} = 19.47, P = 0.0001$    | $F_{1,28} = 4.788, P = 0.0375$  |
| Fig.2 H | TH                             | Two-way ANOVA    | n=8   | MPTP: $F_{1,28} = 37.38, P < 0.0001$   | KO: $F_{1,28} = 2.322, P = 0.1387$    | $F_{1,28} = 15.57, P = 0.0005$  |
| Fig.2 J | TH                             | Two-way ANOVA    | n=8   | MPTP: $F_{1,28} = 22.69, P < 0.0001$   | KO: $F_{1,28} = 18.23, P = 0.0002$    | $F_{1,28} = 13.41, P = 0.0010$  |
| Fig.2 L | OX42                           | Two-way ANOVA    | n=4   | MPTP: $F_{1,12} = 89.54, P < 0.0001$   | KO: $F_{1,12} = 17.15, P = 0.0014$    | $F_{1,12} = 28.71, P = 0.0002$  |
| Fig.2 O | DAT                            | Two-way ANOVA    | n=6   | MPTP: $F_{1,20} = 17.80, P = 0.0004$   | KO: $F_{1,20} = 4.890, P = 0.0388$    | $F_{1,20} = 9.378, P = 0.0061$  |
| Fig.3 A | p-PERK/PERK                    | Two-way ANOVA    | n=7   | MPTP: $F_{1,24} = 3.784, P = 0.0636$   | TPPU: $F_{1,24} = 0.8376, P = 0.3692$ | $F_{1,24} = 4.600, P = 0.0423$  |
|         | p-eIF2 $\alpha$ /eIF2 $\alpha$ | Two-way ANOVA    | n=7   | MPTP: $F_{1,24} = 4.483, P = 0.0448$   | TPPU: $F_{1,24} = 5.748, P = 0.0246$  | $F_{1,24} = 18.67, P = 0.0002$  |
|         | Bip                            | Two-way ANOVA    | n=7   | MPTP: $F_{1,24} = 13.83, P = 0.0011$   | TPPU: $F_{1,24} = 4.264, P = 0.0499$  | $F_{1,24} = 6.871, P = 0.0150$  |
|         | p-IRE1/IRE1                    | Two-way ANOVA    | n=7   | MPTP: $F_{1,24} = 8.738, P = 0.0069$   | TPPU: $F_{1,24} = 1.472, P = 0.2369$  | $F_{1,24} = 12.80, P = 0.0015$  |
|         | sXBP-1                         | Two-way ANOVA    | n=7   | MPTP: $F_{1,24} = 11.37, P = 0.0025$   | TPPU: $F_{1,24} = 6.163, P = 0.0204$  | $F_{1,24} = 5.745, P = 0.0247$  |
|         | p-JNK/JNK                      | Two-way ANOVA    | n=7   | MPTP: $F_{1,24} = 3.597, P = 0.070$    | TPPU: $F_{1,24} = 6.319, P = 0.0191$  | $F_{1,24} = 4.528, P = 0.0438$  |
|         | ATF6                           | Two-way ANOVA    | n=7   | MPTP: $F_{1,24} = 23.36, P < 0.0001$   | TPPU: $F_{1,24} = 1.219, P = 0.2804$  | $F_{1,24} = 9.943, P = 0.0043$  |
|         | cATF6                          | Two-way ANOVA    | n=7   | MPTP: $F_{1,24} = 16.72, P = 0.0004$   | TPPU: $F_{1,24} = 1.042, P = 0.3175$  | $F_{1,24} = 6.880, P = 0.0149$  |
|         | p-p38/p38                      | Two-way ANOVA    | n=7   | MPTP: $F_{1,24} = 0.7386, P = 0.3986$  | TPPU: $F_{1,24} = 7.842, P = 0.010$   | $F_{1,24} = 60.53, P < 0.0001$  |
| Fig.3 B | p-PERK/PERK                    | Two-way ANOVA    | n=6-7 | MPTP: $F_{1,21} = 11.70, P = 0.0026$   | KO: $F_{1,21} = 24.60, P < 0.0001$    | $F_{1,21} = 4.472, P = 0.0466$  |
|         | p-eIF2 $\alpha$ /eIF2 $\alpha$ | Two-way ANOVA    | n=6-7 | MPTP: $F_{1,21} = 1.412, P = 0.2486$   | KO: $F_{1,21} = 1.714, P = 0.2053$    | $F_{1,21} = 4.565, P = 0.0452$  |
|         | Bip                            | Two-way ANOVA    | n=6-7 | MPTP: $F_{1,21} = 8.817, P = 0.0073$   | KO: $F_{1,21} = 0.0281, P = 0.8685$   | $F_{1,21} = 11.84, P = 0.0025$  |
|         | p-IRE1/IRE1                    | Two-way ANOVA    | n=6-7 | MPTP: $F_{1,21} = 15.29, P = 0.0008$   | KO: $F_{1,21} = 18.84, P = 0.0003$    | $F_{1,21} = 4.411, P = 0.048$   |
|         | sXBP-1                         | Two-way ANOVA    | n=6-7 | MPTP: $F_{1,21} = 5.806, P = 0.0248$   | TPPU: $F_{1,21} = 9.558, P = 0.0053$  | $F_{1,21} = 0.6413, P = 0.4318$ |
|         | p-JNK/JNK                      | Two-way ANOVA    | n=6-7 | MPTP: $F_{1,21} = 8.730, P = 0.0073$   | KO: $F_{1,21} = 3.841, P = 0.0628$    | $F_{1,21} = 4.822, P = 0.0389$  |
|         | ATF6                           | Two-way ANOVA    | n=6-7 | MPTP: $F_{1,21} = 3.671, P = 0.0679$   | KO: $F_{1,21} = 8.863, P = 0.0067$    | $F_{1,21} = 25.40, P < 0.0001$  |
|         | cATF6                          | Two-way ANOVA    | n=6-7 | MPTP: $F_{1,21} = 1.308, P = 0.265$    | KO: $F_{1,21} = 6.227, P = 0.0201$    | $F_{1,21} = 10.92, P = 0.0032$  |
|         | p-p38/p38                      | Two-way ANOVA    | n=6-7 | MPTP: $F_{1,21} = 4.274, P = 0.0501$   | KO: $F_{1,21} = 1.095, P = 0.3063$    | $F_{1,21} = 6.248, P = 0.0197$  |
| Fig.3 C | iNOS                           | Two-way ANOVA    | n=6-7 | MPTP: $F_{1,21} = 17.10, P = 0.0005$   | TPPU: $F_{1,21} = 14.08, P = 0.0012$  | $F_{1,21} = 4.644, P = 0.0429$  |
|         | SOD                            | Two-way ANOVA    | n=6-7 | MPTP: $F_{1,21} = 5.253, P = 0.0319$   | TPPU: $F_{1,21} = 0.0017, P = 0.9676$ | $F_{1,21} = 12.52, P = 0.0018$  |
| Fig.3 D | iNOS                           | Two-way ANOVA    | n=6-7 | MPTP: $F_{1,21} = 8.234, P = 0.0098$   | KO: $F_{1,21} = 0.008, P = 0.0317$    | $F_{1,21} = 11.57, P = 0.003$   |
|         | SOD                            | Two-way ANOVA    | n=6-7 | MPTP: $F_{1,21} = 5.008, P = 0.0347$   | KO: $F_{1,21} = 4.788, P = 0.0414$    | $F_{1,21} = 1.208, P = 0.2854$  |
| Fig.5 E | TH-positive cells              | Two-way ANOVA    | n=4   | PARK2: $F_{1,12} = 0.3090, P = 0.5885$ | TPPU: $F_{1,12} = 1.866, P = 0.197$   | $F_{1,12} = 0.0032, P = 0.956$  |
| Fig.5 F | Cleaved caspase-3              | Two-way ANOVA    | n=4   | PARK2: $F_{1,12} = 9.999, P = 0.0082$  | TPPU: $F_{1,12} = 5.356, P = 0.0392$  | $F_{1,12} = 2.467, P = 0.142$   |

**Table S2. Levels of eicosanoids metabolites in the striatum.**

|                     | Control        |   |              | MPTP           |   |              | P value      |
|---------------------|----------------|---|--------------|----------------|---|--------------|--------------|
| 6-keto-PGF1a        | 19.967         | ± | 1.629        | 20.015         | ± | 1.352        | 0.653        |
| TXB2                | 103.088        | ± | 8.432        | 98.406         | ± | 4.740        | 0.866        |
| 9,12,13-TriHOME     | 69.431         | ± | 18.606       | 59.487         | ± | 4.168        | 0.582        |
| 9,10,13-TriHOME     | 40.382         | ± | 10.250       | 33.635         | ± | 2.452        | 0.495        |
| <b>PGF2a</b>        | <b>207.788</b> | ± | <b>9.015</b> | <b>160.704</b> | ± | <b>7.212</b> | <b>0.021</b> |
| PGE2                | 15.900         | ± | 0.477        | 13.830         | ± | 1.069        | 0.190        |
| PGD2                | 149.644        | ± | 8.398        | 127.452        | ± | 4.968        | 0.071        |
| 15,16-DiHODE        | 4.004          | ± | 0.542        | 3.667          | ± | 0.609        | 0.498        |
| 12,13-DiHOME        | 7.095          | ± | 0.390        | 8.348          | ± | 1.710        | 0.714        |
| <b>9,10-DiHOME</b>  | <b>3.226</b>   | ± | <b>0.601</b> | <b>1.346</b>   | ± | <b>0.158</b> | <b>0.004</b> |
| 19,20-DiHDPE        | 4.092          | ± | 0.792        | 5.310          | ± | 0.523        | 0.392        |
| EKODE               | 19.927         | ± | 6.196        | 23.007         | ± | 4.170        | 0.700        |
| 13-HODE             | 47.613         | ± | 11.285       | 58.399         | ± | 5.240        | 0.326        |
| 9-HODE              | 40.195         | ± | 6.041        | 41.360         | ± | 3.045        | 0.710        |
| 15-HETE             | 124.063        | ± | 11.440       | 129.113        | ± | 6.703        | 0.484        |
| 11-HETE             | 123.175        | ± | 9.516        | 114.056        | ± | 5.188        | 0.587        |
| 9-oxo-ODE           | 33.256         | ± | 5.598        | 46.977         | ± | 5.160        | 0.072        |
| 12-HETE             | 102.788        | ± | 8.210        | 136.621        | ± | 26.845       | 0.171        |
| 12(13)-EpOME        | 7.595          | ± | 1.590        | 7.073          | ± | 0.689        | 0.745        |
| 14(15)-EpETrE       | 89.347         | ± | 7.351        | 77.976         | ± | 11.479       | 0.512        |
| 9(10)-EpOME         | 6.158          | ± | 0.899        | 6.641          | ± | 0.431        | 0.607        |
| <b>10(11)-EpDPE</b> | <b>5.301</b>   | ± | <b>1.525</b> | <b>9.530</b>   | ± | <b>0.829</b> | <b>0.015</b> |
| 11(12)-EpETrE       | 71.998         | ± | 6.178        | 61.583         | ± | 4.605        | 0.235        |
| <b>8(9)-EpETrE</b>  | <b>36.708</b>  | ± | <b>4.502</b> | <b>19.048</b>  | ± | <b>1.310</b> | <b>0.001</b> |
| 5(6)-EpETrE         | 516.259        | ± | 30.771       | 544.908        | ± | 19.111       | 0.447        |

The values are the mean +/- SEM (n = 6).

Student t-test was used.

The bold was statistical significant.

**Table S3. Information of antibodies used in this study**

| Marker           | Species,Isotype                    | Label           | Dilution        | Maker             | Catalog number                    |               |       |
|------------------|------------------------------------|-----------------|-----------------|-------------------|-----------------------------------|---------------|-------|
| Primary antibody | Phospho-PERK(Thr980)               | Rabbit IgG      | –               | 1:1000            | Cell Signaling Technology         | #3179         |       |
|                  | PERK                               | Rabbit IgG      | –               | 1:1000            | Cell Signaling Technology         | #3192         |       |
|                  | Phospho-cIF2 $\alpha$ (Ser51)      | Rabbit IgG      | –               | 1:1000            | Cell Signaling Technology         | #3398         |       |
|                  | cIF2 $\alpha$                      | Rabbit IgG      | –               | 1:1000            | Cell Signaling Technology         | #5324         |       |
|                  | Bip                                | Rabbit IgG      | –               | 1:1000            | Cell Signaling Technology         | #3177         |       |
|                  | IRE1 $\alpha$ (phospho S724)       | Rabbit IgG      | –               | 1:1000            | abcam                             | ab38187       |       |
|                  | IRE1 $\alpha$                      | Rabbit IgG      | –               | 1:1000            | Cell Signaling Technology         | #3294         |       |
|                  | XBP-1s                             | Rabbit IgG      | –               | 1:1000            | Cell Signaling Technology         | #12782        |       |
|                  | JNK1+JNK2(phospho T183+Y185)       | Rabbit IgG      | –               | 1:1000            | abcam                             | ab4821        |       |
|                  | JNK1+JNK2                          | Rabbit IgG      | –               | 1 $\mu$ g/ml      | abcam                             | ab112501      |       |
|                  | ATF6                               | Rabbit IgG      | –               | 1:1000            | Cell Signaling Technology         | #65880        |       |
|                  | Phospho-p38 MAPK(Thr180/Tyr182)    | Rabbit IgG      | –               | 1:1000            | Cell Signaling Technology         | #4511         |       |
|                  | p38 MAPK                           | Rabbit IgG      | –               | 1:1000            | Cell Signaling Technology         | #8690         |       |
|                  | Glutathione                        | Mouse IgG       | –               | 1:1000            | abcam                             | ab19534       |       |
|                  | iNOS                               | Rabbit IgG      | –               | 1:500             | abcam                             | ab3523        |       |
|                  | Superoxide Dismutase 1             | Rabbit IgG      | –               | 0.2 $\mu$ g/ml    | abcam                             | ab13498       |       |
|                  | Tyrosine Hydroxylase               | Rabbit IgG      | –               | 1:1000            | Merck Millipore                   | AB152         |       |
|                  | DAT                                | Rat IgG         | –               | 1:10000 or 1:1000 | Merck Millipore                   | MAB369        |       |
|                  | OX42                               | Rat IgG         | –               | 1 $\mu$ g/ml      | abcam                             | ab1211        |       |
|                  | $\alpha$ -Synuclein (phospho S129) | Rabbit IgG      | –               | 1:5000            | abcam                             | ab51253       |       |
|                  | $\alpha$ -Synuclein                | Mouse IgG       | –               | 1:500             | BD Transduction Laboratories      | 610787        |       |
|                  | mouse sEH                          | Rabbit IgG      | –               | 1:5000            | UC Davis                          | –             |       |
|                  | Human sEH                          | Rabbit IgG      | –               | 1:10000           | UC Davis                          | –             |       |
|                  | $\beta$ -Actin                     | Mouse IgG       | –               | 1:10000           | Sigma-Aldrich                     | A5441         |       |
|                  | $\beta$ 3-tubulin                  | Mouse IgG2b     | –               | 1:1000            | Sigma-Aldrich                     | T8660         |       |
|                  | Tyrosine Hydroxylase               | Mouse IgG1      | –               | 1:500             | Sigma-Aldrich                     | T1299         |       |
|                  | Cleaved Caspase-3                  | Rabbit IgG      | –               | 1:400             | Cell Signaling Technology         | #9661         |       |
|                  | Secondary antibody                 | Anti-rabbit IgG | Goat IgG        | –                 | 1:10000                           | GE healthcare | NA934 |
|                  |                                    | Anti-mouse IgG  | Goat IgG        | –                 | 1:10000                           | GE healthcare | NA931 |
|                  |                                    | Anti-Rat IgG    | Goat IgG        | –                 | 1:10000                           | GE healthcare | NA935 |
| Anti-rabbit IgG  |                                    | Goat IgG        | Alexa Fluor 488 | 1:1000            | Invitrogen                        | A11070        |       |
| Anti-mouse IgG2b |                                    | Goat IgG        | Alexa Fluor 647 | 1:500             | Invitrogen                        | A21242        |       |
| Anti-mouse IgG1  |                                    | Goat IgG        | Alexa Fluor 488 | 1:500             | Invitrogen                        | A21121        |       |
| Anti-rabbit IgG  |                                    | Goat IgG        | Alexa Fluor 555 | 1:500             | Invitrogen                        | A21429        |       |
| Anti-Rat IgG     |                                    | Goat IgG        | Alexa Fluor 647 | 1:1000            | Invitrogen                        | A21247        |       |
| Other            | bisBenzimide H 33258 (Hoechst)     |                 |                 |                   | Tokyo Chemical Industry Co., Ltd. | H1343         |       |
